# Supplementary material for: Global architecture for the nutrition training of health professionals: a scoping review and blueprint for next steps
Source: PubMed Central journal article supplement — BMJ Nutr Prev Health. 2022 Feb 16;5(1):106–17. doi: 10.1136/bmjnph-2021-000354 (PMC9237864; doi:10.1136/bmjnph-2021-000354), 2022-02-16
Supplement: bmjnph-2021-000354supp001.pdf [file bmjnph-2021-000354supp001.pdf]

**Appendix 1. Infographic of findings from ‘Time for Nutrition in Medical Education’<sup>(1)</sup>**

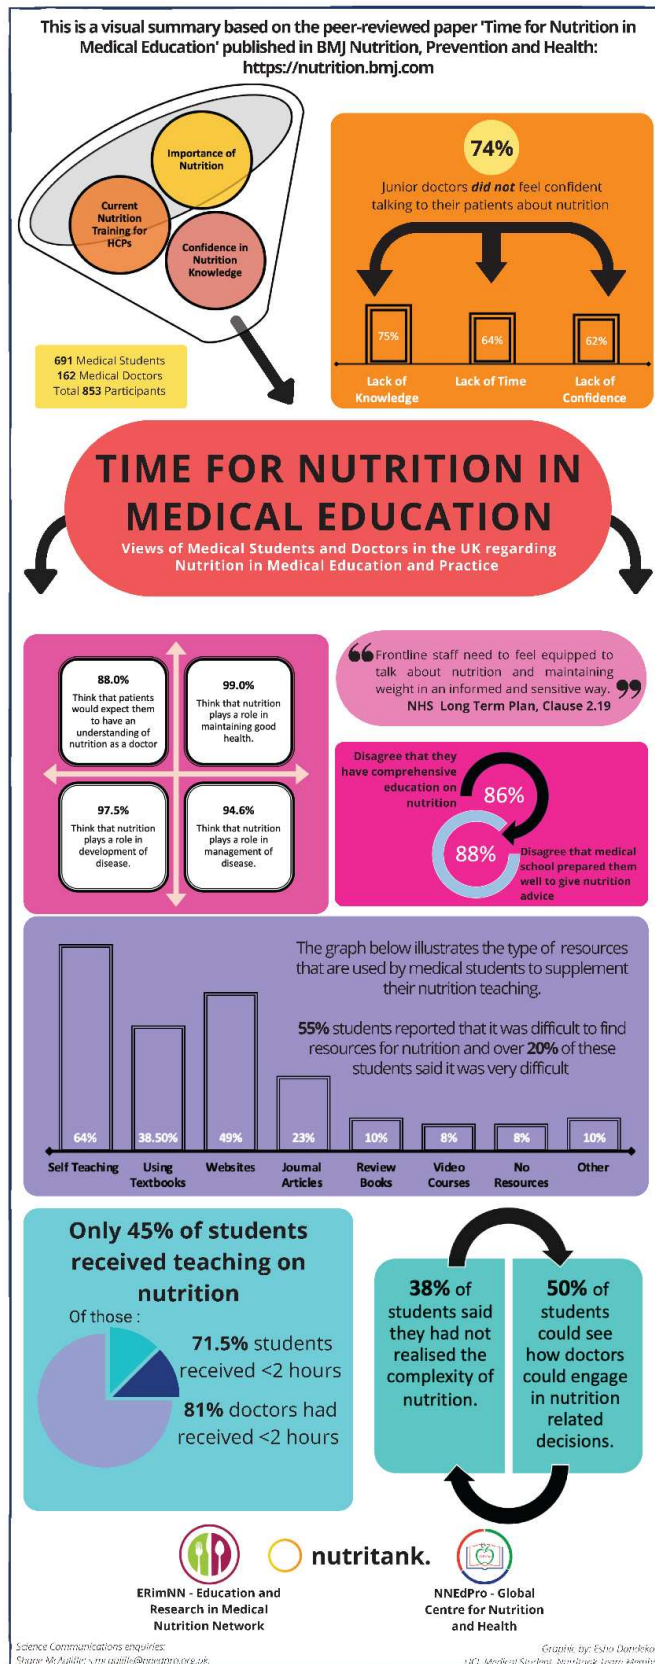

**REFERENCES**

1. Macaninch E, Buckner L, Amin P *et al.* (2020) Time for nutrition in medical education. *BMJ Nutrition, Prevention & Health* 2020;3:40-48.
